# Supplementary material for: Pediatric Patients with Stage IV Rhabdomyosarcoma Significantly Benefit from Long-Term Maintenance Therapy: Results of the CWS-IV 2002 and the CWS DOK IV 2004-Trials
Source: MDPI journal article supplement (doi:10.3390/cancers15072050), 2023-03-30
Supplement: s1 [file s1]

# Supplementary Materials

**Table S1.** Patient characteristics by different final treatment approaches and risk factors. P values determined using Fisher's exact test, chi-square test or Kruskal-Wallis test as appropriate comparing the excluded, LTMT, HDCT and alloHSCT groups.

| Patient characteristics by final treatment *  |                     |                     |                     |                     |        |
|-----------------------------------------------|---------------------|---------------------|---------------------|---------------------|--------|
|                                               | Excluded            | LTMT                | HDCT                | alloSCT             | P      |
| N (%)                                         | 53 (30)             | 89 (51)             | 13 (7)              | 21 (12)             |        |
| <b>Sex, N (%)</b>                             |                     |                     |                     |                     | 0.096  |
| Female                                        | 21 (40)             | 49 (55)             | 6 (46)              | 6 (29)              |        |
| Male                                          | 32 (60)             | 40 (45)             | 7 (54)              | 15 (71)             |        |
| <b>Age, N (%)</b>                             |                     |                     |                     |                     |        |
| Median (range), y                             | 11 (0 – 21)         | 12 (2 – 20)         | 14 (2 – 18)         | 12 (4 – 20)         | 0.707  |
| ≤ 1 y                                         | 4 (8)               | 0                   | 0                   | 0                   |        |
| 1 – 9 y                                       | 22 (42)             | 36 (60)             | 4 (31)              | 7 (33)              |        |
| ≥ 10                                          | 27 (51)             | 53 (40)             | 9 (69)              | 14 (67)             |        |
| <b>Histology, N (%)</b>                       |                     |                     |                     |                     | 0.240  |
| Embryonal RMS                                 | 20 (38)             | 30 (34)             | 4 (31)              | 4 (19)              |        |
| Alveolar RMS                                  | 23 (43)             | 43 (48)             | 8 (62)              | 16 (76)             |        |
| Other                                         | 10 (19)             | 16 (18)             | 1 (8)               | 1 (5)               |        |
| <b>Primary site of tumor, N (%)</b>           |                     |                     |                     |                     | 0.808  |
| Favorable                                     | 6 (11)              | 7 (8)               | 1 (8)               | 1 (5)               |        |
| Unfavorable                                   | 47 (89)             | 82 (92)             | 12 (92)             | 20 (95)             |        |
| <b>Tumor size, N (%)</b>                      |                     |                     |                     |                     | 0.471  |
| ≤ 5 cm                                        | 11 (21)             | 13 (15)             | 1 (8)               | 5 (24)              |        |
| > 5 cm                                        | 40 (75)             | 71 (80)             | 11 (85)             | 13 (62)             |        |
| Unknown                                       | 2 (4)               | 5 (6)               | 1 (8)               | 3 (14)              |        |
| <b>Number of metastases, N (%)</b>            |                     |                     |                     |                     | 0.145  |
| ≤ 2                                           | 39 (74)             | 64 (72)             | 6 (46)              | 12 (57)             |        |
| ≥ 3                                           | 14 (26)             | 25 (28)             | 7 (54)              | 9 (43)              |        |
| <b>Bone or bone marrow involvement, N (%)</b> |                     |                     |                     |                     | <0.001 |
| Yes                                           | 24 (45)             | 33 (37)             | 9 (69)              | 18 (86)             |        |
| No                                            | 29 (55)             | 56 (63)             | 4 (31)              | 3 (14)              |        |
| <b>Oberlin score, (%)</b>                     |                     |                     |                     |                     | 0.019  |
| ≤ 1                                           | 14 (26)             | 29 (33)             | 1 (8)               | 1 (5)               |        |
| ≥ 2                                           | 39 (74)             | 60 (67)             | 12 (92)             | 20 (95)             |        |
| <b>Period of start initial chemotherapy</b>   |                     |                     |                     |                     | 0.643  |
| Median                                        | Mar 2006            | Oct 2006            | Jul 2005            | Aug 2006            |        |
| Range                                         | Feb 2003 - May 2010 | Nov 2002 - Jul 2010 | Aug 2003 - May 2009 | Apr 2003 - Feb 2009 |        |
| <b>Protocol, N (%)</b>                        |                     |                     |                     |                     | 0.562  |
| CWS-IV-2002                                   | 8 (15)              | 15 (17)             | 2 (15)              | 6 (29)              |        |
| CWS DOK IV 2004                               | 45 (85)             | 74 (83)             | 11 (85)             | 15 (71)             |        |
| <b>Initial chemotherapy, N (%)</b>            |                     |                     |                     |                     | 0.195  |
| Window TC/VAIA                                | 33 (62)             | 48 (54)             | 6 (46)              | 14 (67)             |        |
| CEVAIE                                        | 16 (30)             | 40 (45)             | 6 (46)              | 7 (33)              |        |
| Others                                        | 4 (8)               | 1 (1)               | 1 (8)               | 0                   |        |

Time between start of initial chemotherapy and final treatment, days

0.001

|        |   |           |           |           |
|--------|---|-----------|-----------|-----------|
| Median | - | 258       | 226       | 228       |
| Range  | - | 133 - 472 | 167 - 320 | 170 - 344 |

Period of start final treatment

0.537

|        |   |                   |                     |                     |
|--------|---|-------------------|---------------------|---------------------|
| Median | - | Jul 2007          | May 2006            | May 2007            |
| Range  | - | Jun 2003-May 2011 | Mar 2004 - Jan 2010 | Dec 2003 - Sep 2009 |

\* The patient characteristics of excluded patients (n=53) were similar to total patients

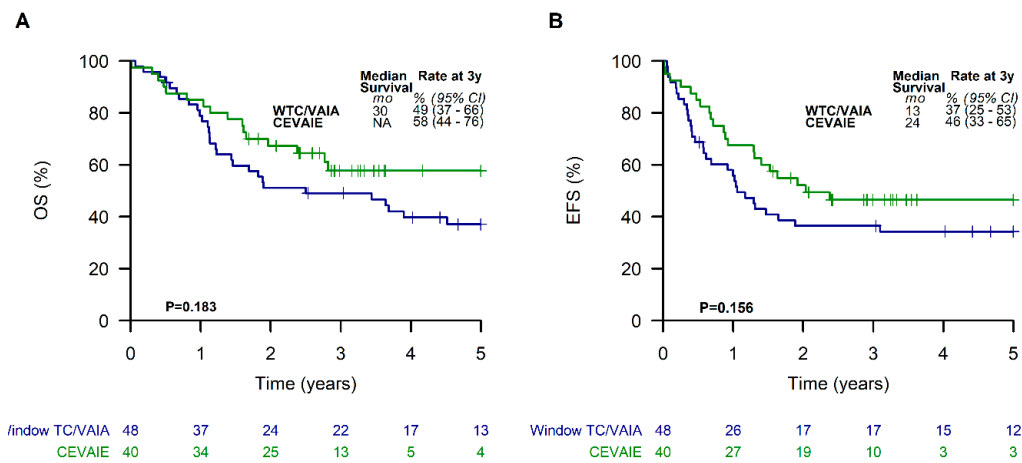

Figure S1. Overall survival (A) and event-free survival (B) of patients receiving a metronomic long-term maintenance therapy with respect to the different conventional chemotherapy regimens.

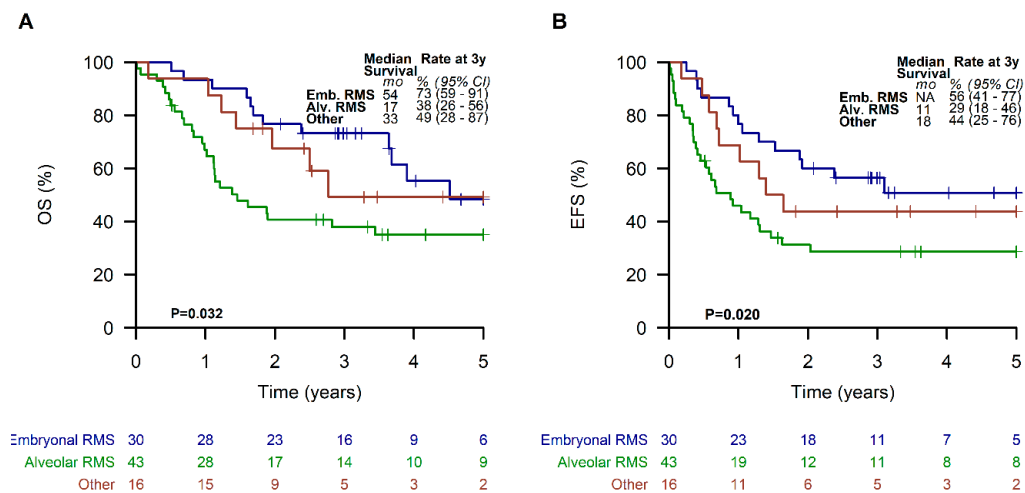

Figure S2. Overall survival (A) and event-free survival (B) of all patients with regard to the different histological subtypes.
